# Supplementary material for: Change of iron species and iron solubility in Asian dust during the long-range transport from western China to Japan
Source: Copernicus journal article supplement (doi:10.5194/acp-11-11237-2011), 2011-11-11
Supplement: Supplementary file 1 [file acp-11-11237-2011-supplement.pdf]

Supporting Materials for

**Change of iron species and iron solubility in  
Asian dust during the long-range transport  
from western China to Japan**

*Yoshio TAKAHASHI,<sup>\*,1</sup> Masayuki HIGASHI,<sup>1</sup>  
Takema FURUKAWA,<sup>1</sup> and Satoshi MITSUNOBU<sup>2</sup>*

<sup>1</sup>Department of Earth and Planetary Systems Science, Graduate School of Science,  
Hiroshima University, Higashi-Hiroshima, Hiroshima 739-8526, Japan

<sup>2</sup>University of Shizuoka, 52-1 Yadad, Suruga-ku, Shizuoka 422-8526

\*Corresponding author - phone: +81-824-24-7460 ; fax: +81-824-24-0735 ;  
e-mail: ytakaha@hiroshima-u.ac.jp

Summary of the number in Supplementary Information

- the number of pages: 7 (including this sheet)
- the number of figures: 4
- the number of table: 3

**Table S1. Sampling sites and periods.**

| Station | Location                                                                      | Latitude (N),<br>Longitude (E) | Height (meters<br>above S. L.) | Sampling Period<br>(low-volume) | Sampling Period<br>(high-volume) |
|---------|-------------------------------------------------------------------------------|--------------------------------|--------------------------------|---------------------------------|----------------------------------|
| Aksu    | The Aksu Water Budget<br>Experiment Station,<br>Chinese Academy of<br>Science | 40°37′,<br>80°44′              | 7                              | 15–21 March,<br>2002            | 15–18 March,<br>2002             |
| Qingdao | Ocean University of<br>China                                                  | 36°07′,<br>120°33′             | 80                             | 20–23 March,<br>2002            |                                  |
| Tsukuba | Geological Survey of Japan                                                    | 36°06′,<br>140°14′             | 44                             | 20–31 March,<br>2002            | 20–26 March,<br>2002             |

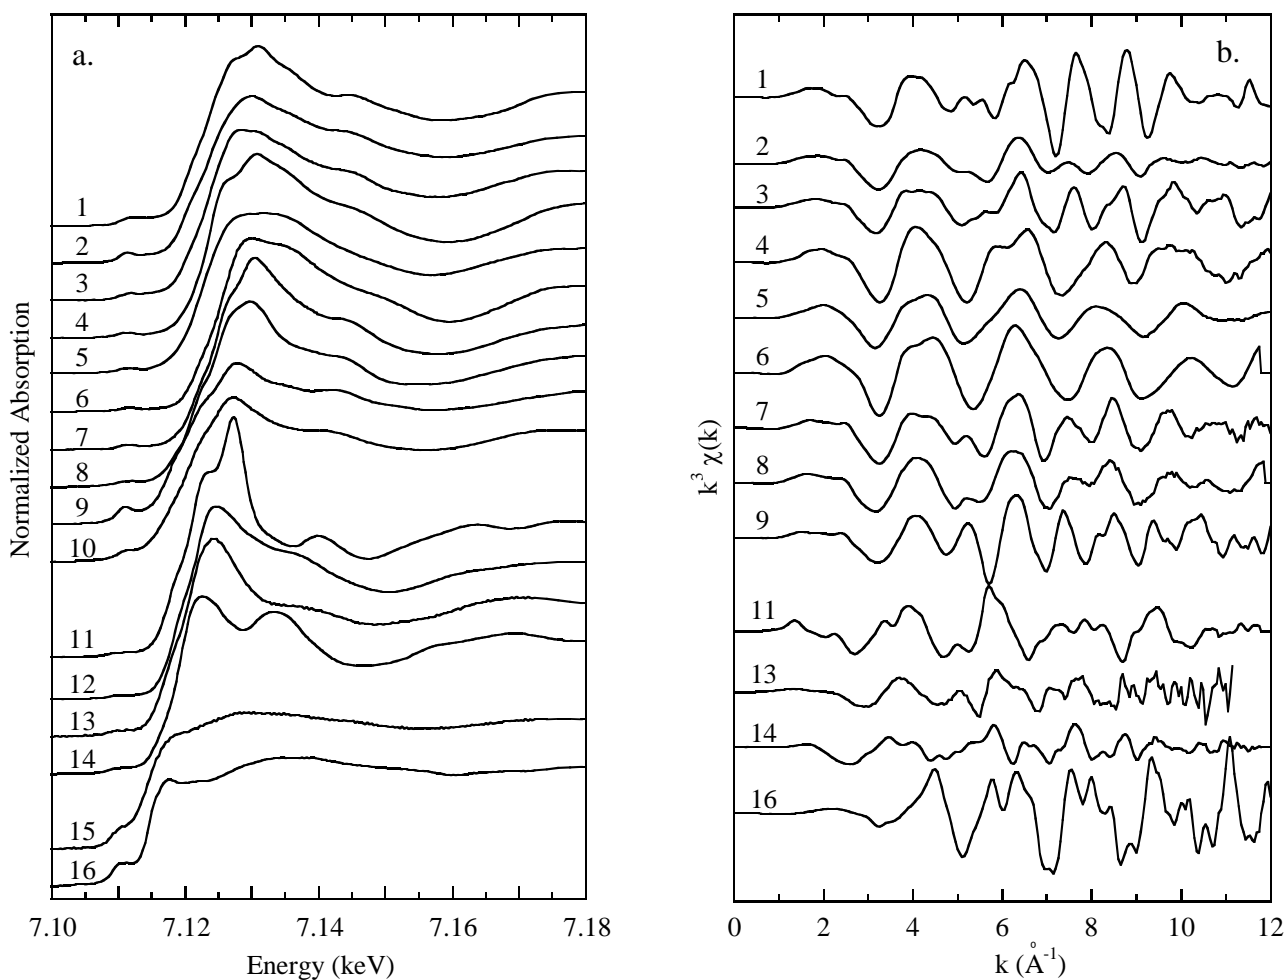

**Figure S1. (a) Normalized Fe K-edge XANES and (b) normalized  $k^3$ -weighted EXAFS spectra for various reference materials.** 1 hematite ( $\alpha$ - $\text{Fe}_2\text{O}_3$ ); 2 ferrihydrite; 3 goethite ( $\alpha$ - $\text{FeOOH}$ ); 4 Fe(III) oxalate; 5 Fe(III) citrate; 6 Fe(III) sulfate; 7 smectite (SWy-2); 8 illite (IMt-1); 9 magnetite ( $\text{Fe}_3\text{O}_4$ ); 10 Fe (II) oxide; 11 chlorite (CCa-2); 12 Fe(II) sulfate; 13 fayalite ( $\text{Fe}_2\text{SiO}_4$ ); 14 siderite ( $\text{FeCO}_3$ ); 15 pyrrhotite ( $\text{Fe}_7\text{S}_8$ ); 16 pyrite ( $\text{FeS}_2$ ). SWy-2, IMt-1, and CCa-2 were obtained from the Source Clays Repository of the Clay Mineral Society.

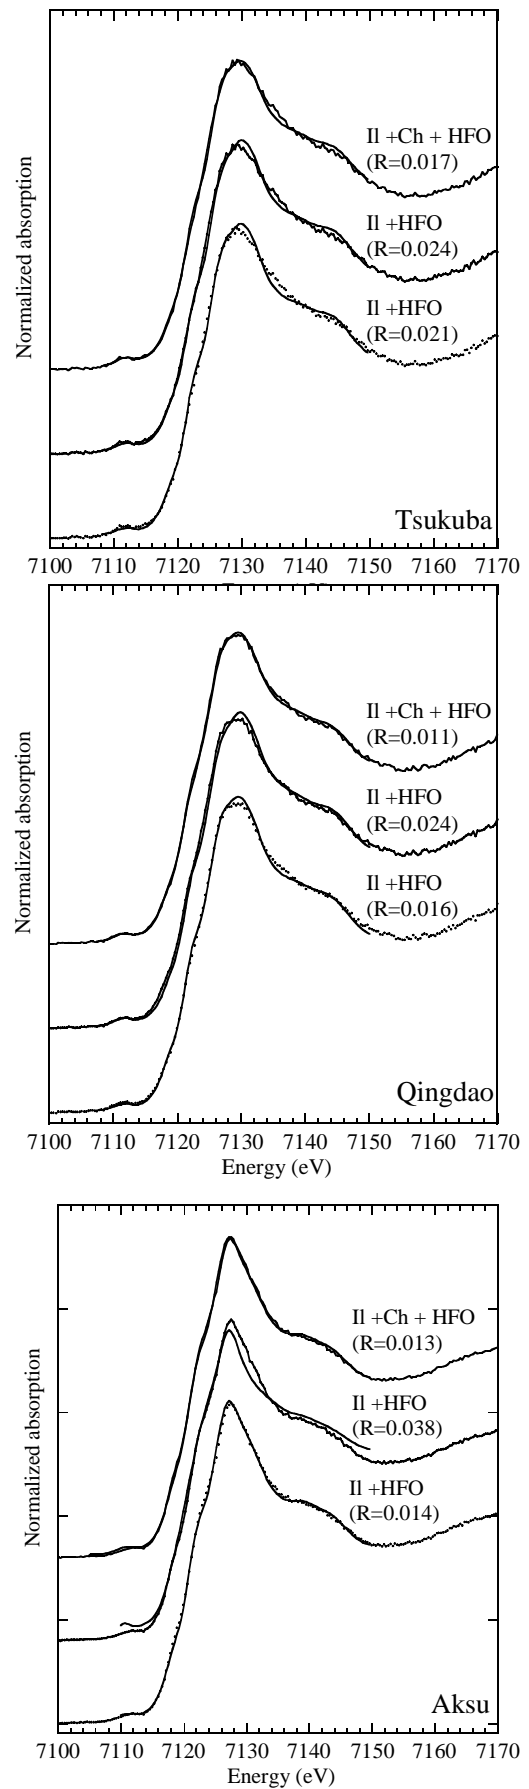

**Figure S2. Examples of fitting of XANES spectra for aerosols collected in Aksu, Qingdao, and Tsukuba, showing that three components are needed to fit the spectra. II: illite; Ch: chlorite; HFO: ferrihydrite.**

**Table S2. Results of Fe speciation (mol%) in aerosols by fitting of XANES and EXAFS spectra (FY mode) with the R values. The results for XANES measured in CEY mode are also presented.**

| Aksu, FY mode    |          |          |              |             | Aksu, CEY mode    |          |          |              |             |
|------------------|----------|----------|--------------|-------------|-------------------|----------|----------|--------------|-------------|
| Stage            | Illite   | Chlorite | Ferrihydrite | R value (%) | Stage             | Illite   | Chlorite | Ferrihydrite | R value (%) |
| 0                | 72.3±7.4 | 22.0±1.6 | 5.6±7.6      | 1.0         | 0                 | 75.8±5.3 | 17.9±1.0 | 6.3±5.4      | 1.9         |
|                  | 54.3±2.9 | 35.5±1.2 | 10.2±3.1     | 5.1         |                   |          |          |              |             |
| 1                | 62.4±5.4 | 27.2±0.8 | 10.4±5.4     | 1.3         | 1                 | 66.2±5.8 | 17.5±1.4 | 16.3±6.0     | 0.9         |
|                  | 61.8±5.7 | 25.0±2.4 | 13.2±6.2     | 9.0         |                   |          |          |              |             |
| 2                | 63.9±6.6 | 29.3±1.4 | 6.8±6.8      | 1.7         | 2                 | 70.5±5.3 | 17.4±1.2 | 12.1±5.4     | 1.1         |
|                  | 37.7±2.9 | 31.0±1.2 | 31.2±3.1     | 5.2         |                   |          |          |              |             |
| 3                | 70.5±4.5 | 23.5±1.0 | 6.0±4.6      | 1.2         | 3                 | 71.9±3.7 | 24.1±0.9 | 4.1±3.8      | 4.8         |
|                  | 59.3±3.0 | 28.0±1.3 | 12.7±3.3     | 7.3         |                   |          |          |              |             |
| 4                | 72.3±4.4 | 23.0±0.7 | 4.6±4.5      | 1.3         | 4                 | 72.2±9.4 | 18.9±2.0 | 8.8±4.6      | 0.9         |
|                  | 56.6±2.6 | 30.0±1.1 | 13.4±2.8     | 5.7         |                   |          |          |              |             |
| Qingdao, FY mode |          |          |              |             | Qingdao, CEY mode |          |          |              |             |
| Stage            | Illite   | Chlorite | Ferrihydrite | R value (%) | Stage             | Illite   | Chlorite | Ferrihydrite | R value (%) |
| 0                | 54.3±5.1 | 18.4±0.6 | 27.3±5.1     | 1.4         | 0                 | 60.7±8.6 | 3.9±0.7  | 36.3±5.4     | 3.3         |
|                  | 65.7±3.7 | 10.1±1.5 | 24.2±4.0     | 8.2         |                   |          |          |              |             |
| 1                | 67.0±4.8 | 14.4±0.6 | 18.6±4.8     | 1.2         | 1                 | 63±3.9   | 0        | 37±3.9       | 2.9         |
|                  |          |          |              |             |                   |          |          |              |             |
| 2                | 63.8±4.5 | 17.6±0.5 | 18.6±4.5     | 1.5         | 2                 | 60.1±8.7 | 4.4±0.7  | 35.5±8.7     | 2.6         |
|                  | 69.2±5.4 | 7.6±2.3  | 23.2±5.8     | 6.9         |                   |          |          |              |             |
| 3                | 68.7±4.5 | 9.8±0.5  | 21.5±4.5     | 1.4         | 3                 | 75.6±6.8 | 5.4±6.8  | 19±6.8       | 5.6         |
|                  |          |          |              |             |                   |          |          |              |             |
| 4                | 73.4±6.7 | 12.1±0.8 | 14.5±6.8     | 1.5         | 4                 | 69.0±3.4 | 0        | 31.0±3.4     | 3.3         |
|                  | 75.7±4.1 | 10.8±1.7 | 13.5±4.5     | 9.3         |                   |          |          |              |             |
| Tsukuba, FY mode |          |          |              |             | Tsukuba, CEY mode |          |          |              |             |
| Stage            | Illite   | Chlorite | Ferrihydrite | R value (%) | Stage             | Illite   | Chlorite | Ferrihydrite | R value (%) |
| 0                | 58.3±5.8 | 9.2±0.9  | 32.6±5.9     | 1.9         | 0                 | 49.7±6.9 | 3.8±0.6  | 46.4±6.9     | 2.7         |
|                  | 69.6±4.8 | 1.0±2.0  | 29.4±5.2     | 10.0        |                   |          |          |              |             |
| 1                | 74.0±5.8 | 4.6±1.0  | 21.3±5.8     | 1.8         | 1                 | 50.7±5.7 | 4.0±0.5  | 45.3±5.7     | 1.3         |
|                  |          |          |              |             |                   |          |          |              |             |
| 2                | 61.8±6.2 | 9.7±1.0  | 28.9±6.3     | 1.9         | 2                 | 58.4±0   | 4.4±0.7  | 41.6±0       | 2.2         |
|                  | 57.9±4.7 | 4.1±2.0  | 37.9±5.1     | 8.4         |                   |          |          |              |             |
| 3                | 65.9±5.0 | 6.4±0.8  | 27.7±5.0     | 1.7         | 3                 | 64.1±4.0 | 0        | 35.9±4.0     | 5.6         |
|                  |          |          |              |             |                   |          |          |              |             |
| 4                | 69.3±5.7 | 8.5±0.9  | 22.2±5.8     | 2.3         | 4                 | 65.3±3.4 | 3.8±1.0  | 30.9±11.7    | 5.4         |
|                  | 75.7±4.1 | 1.8±1.7  | 22.5±4.5     | 9.3         |                   |          |          |              |             |

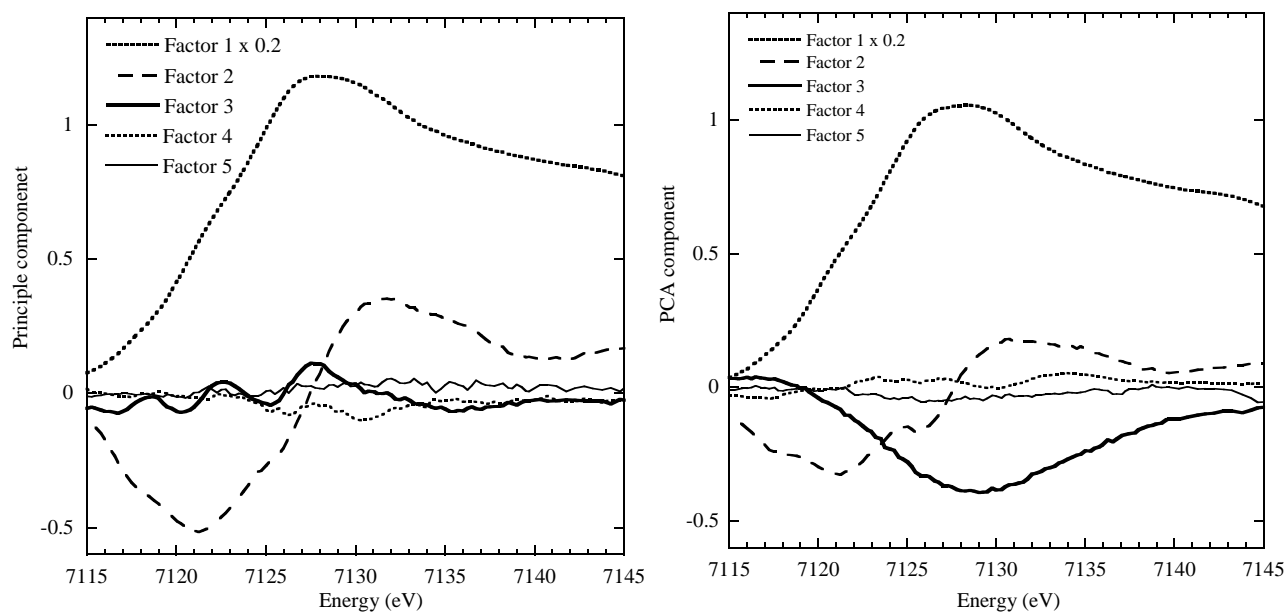

**Figure S3. Abstract components of absorbance, obtained from experimental XANES spectra for Fe in aerosols in FY and CEY mode using PCA, suggesting that three or four end members are necessary to the original spectra.**

Table S3. PCA analysis of all the XANES spectra in fluorescence mode.

| Component | Eignevalues | Variance | Cumulative variance |
|-----------|-------------|----------|---------------------|
| 1         | 14.891915   | 0.992794 | 0.992794            |
| 2         | 0.104224    | 0.006948 | 0.999743            |
| 3         | 0.001834    | 0.000122 | 0.999865            |
| 4         | 0.000603    | 0.00004  | 0.999905            |
| 5         | 0.000389    | 0.000026 | 0.999931            |
| 6         | 0.000252    | 0.000017 | 0.999948            |
| 7         | 0.000161    | 0.000011 | 0.999959            |
| 8         | 0.000152    | 0.00001  | 0.999969            |

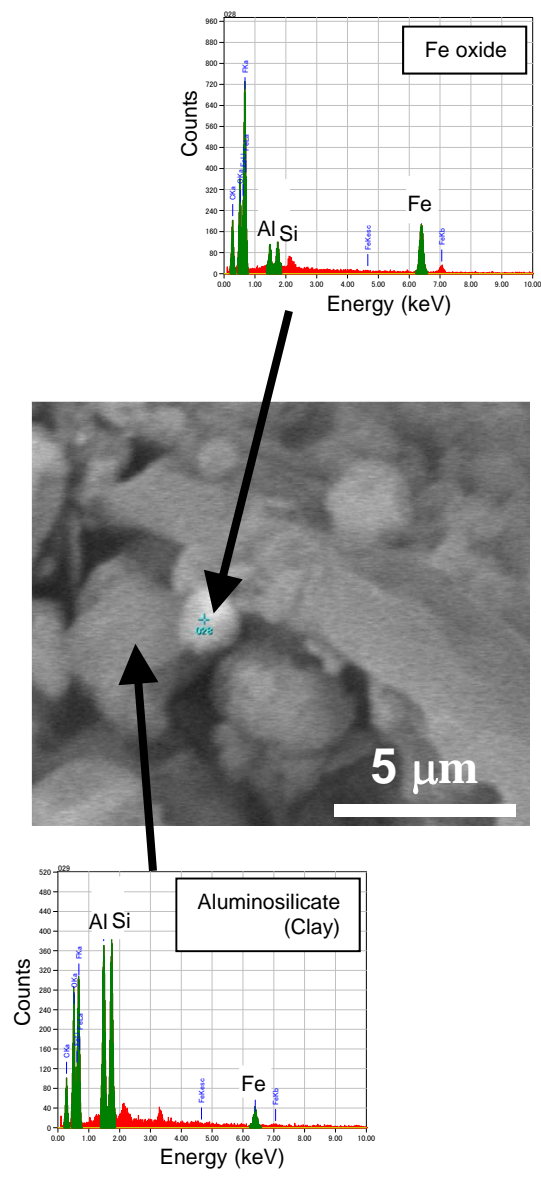

**Figure S4. SEM image of aerosol particles collected on stage 1 in Tsukuba in the dust period. Small particle of Fe oxide is associated with clay particles.**
